# Supplementary material for: Species-specific roles for the MAFA and MAFB transcription factors in regulating islet β cell identity
Source: JCI journal article supplement (doi:10.1172/jci.insight.166386), 2023-08-21
Supplement: sd1 [file 1]

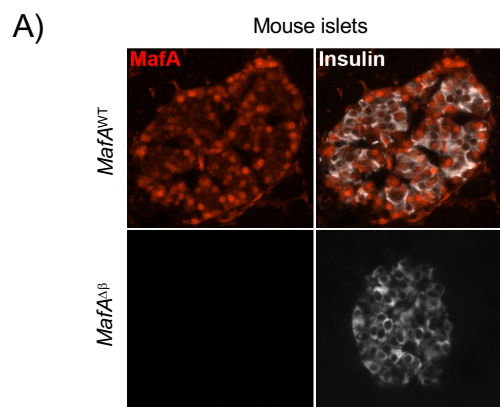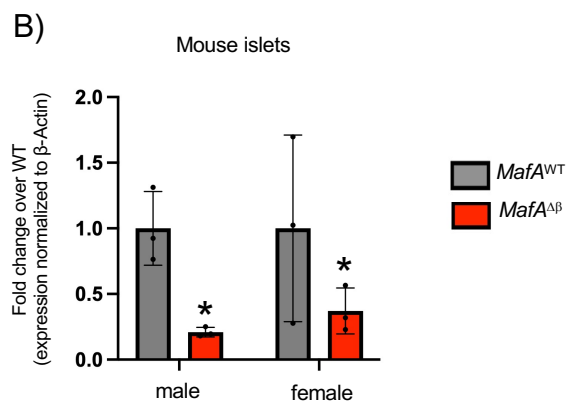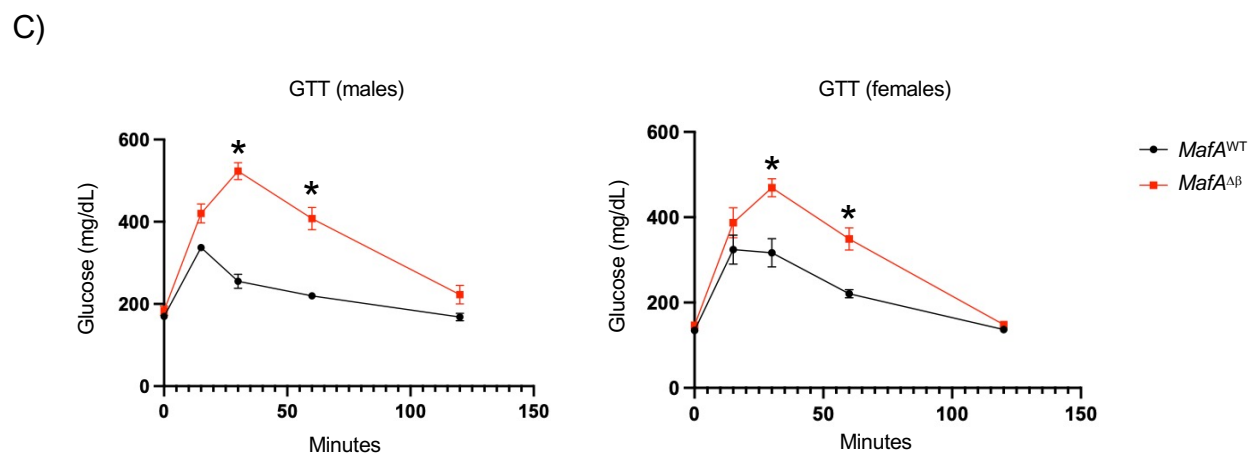

Supplemental Figure 1

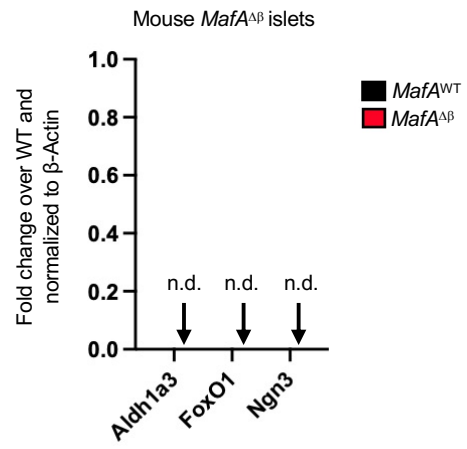

**Supplemental Figure 2**

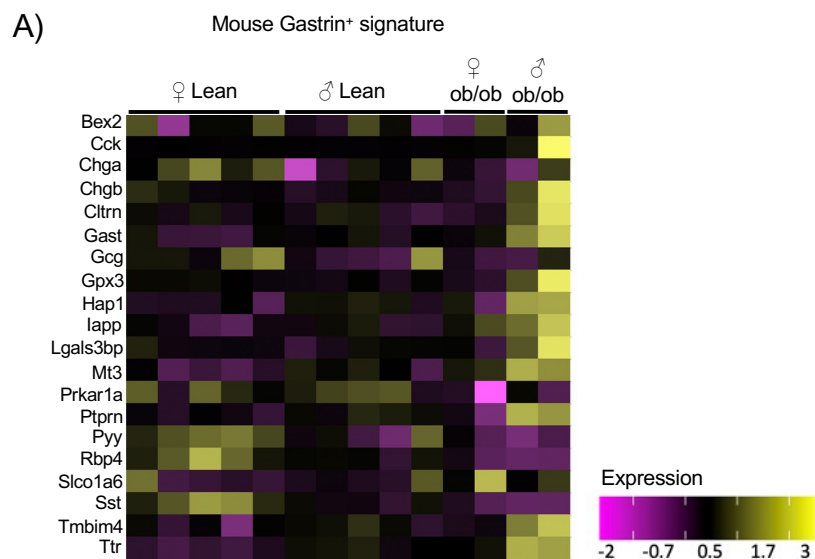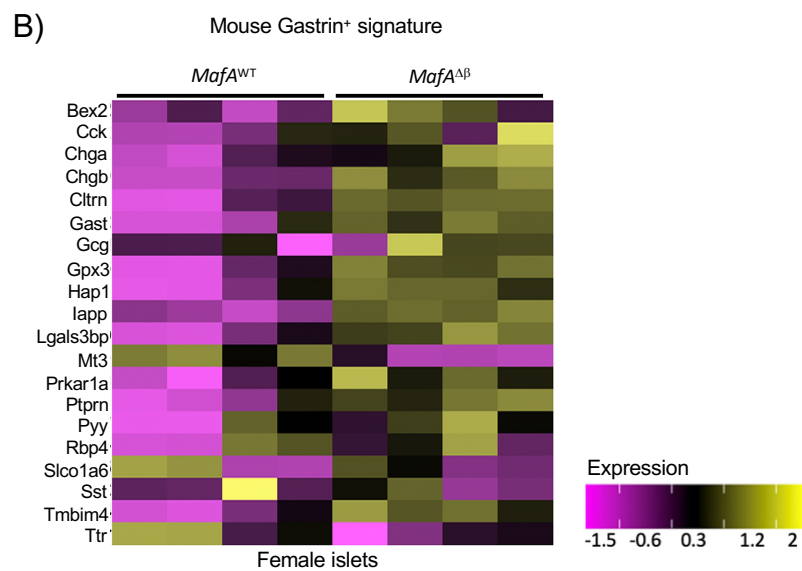

**Supplemental Figure 3**

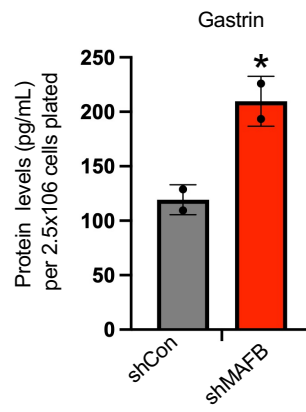

**Supplemental Figure 4**

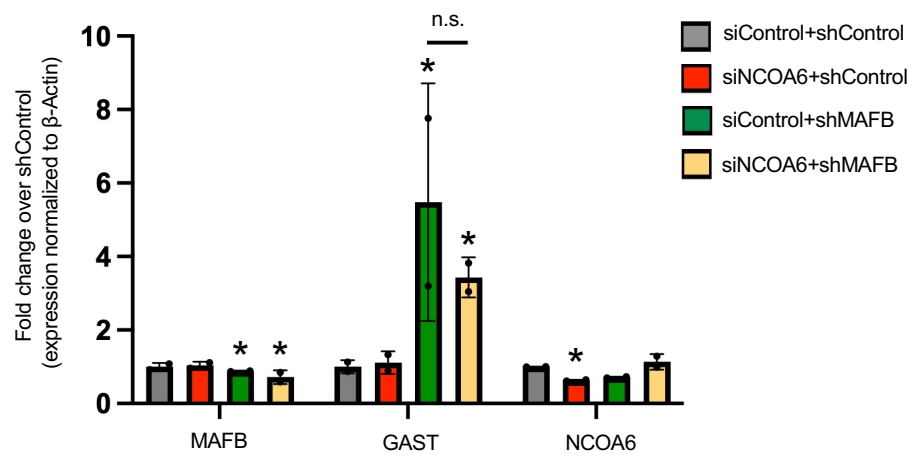

**Supplemental Figure 5**

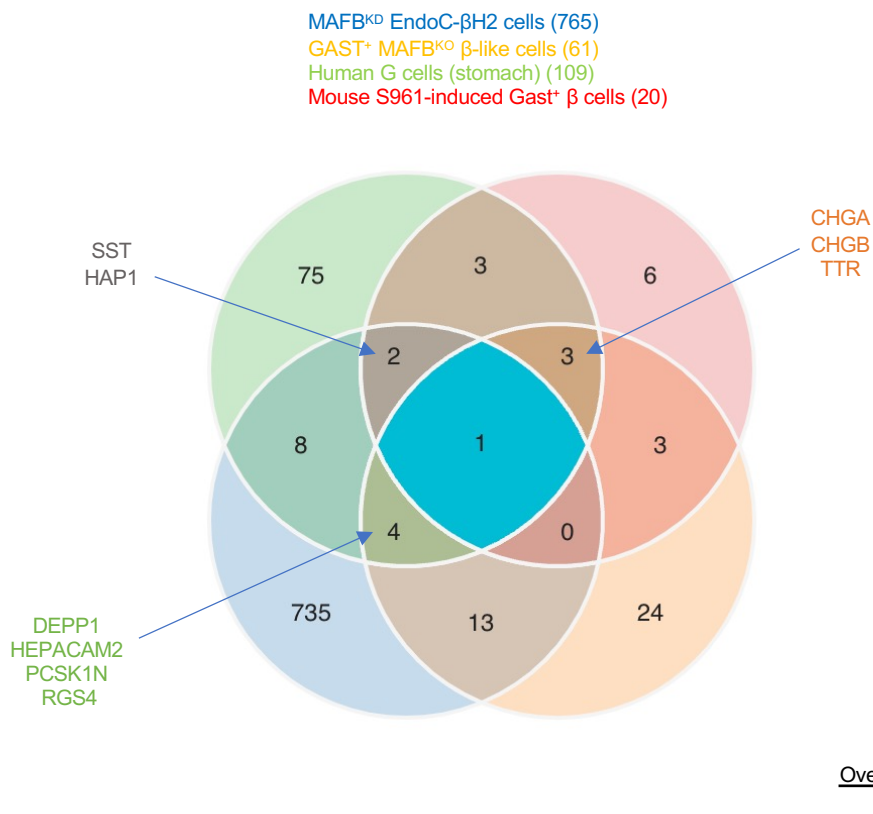

**Supplemental Figure 6**

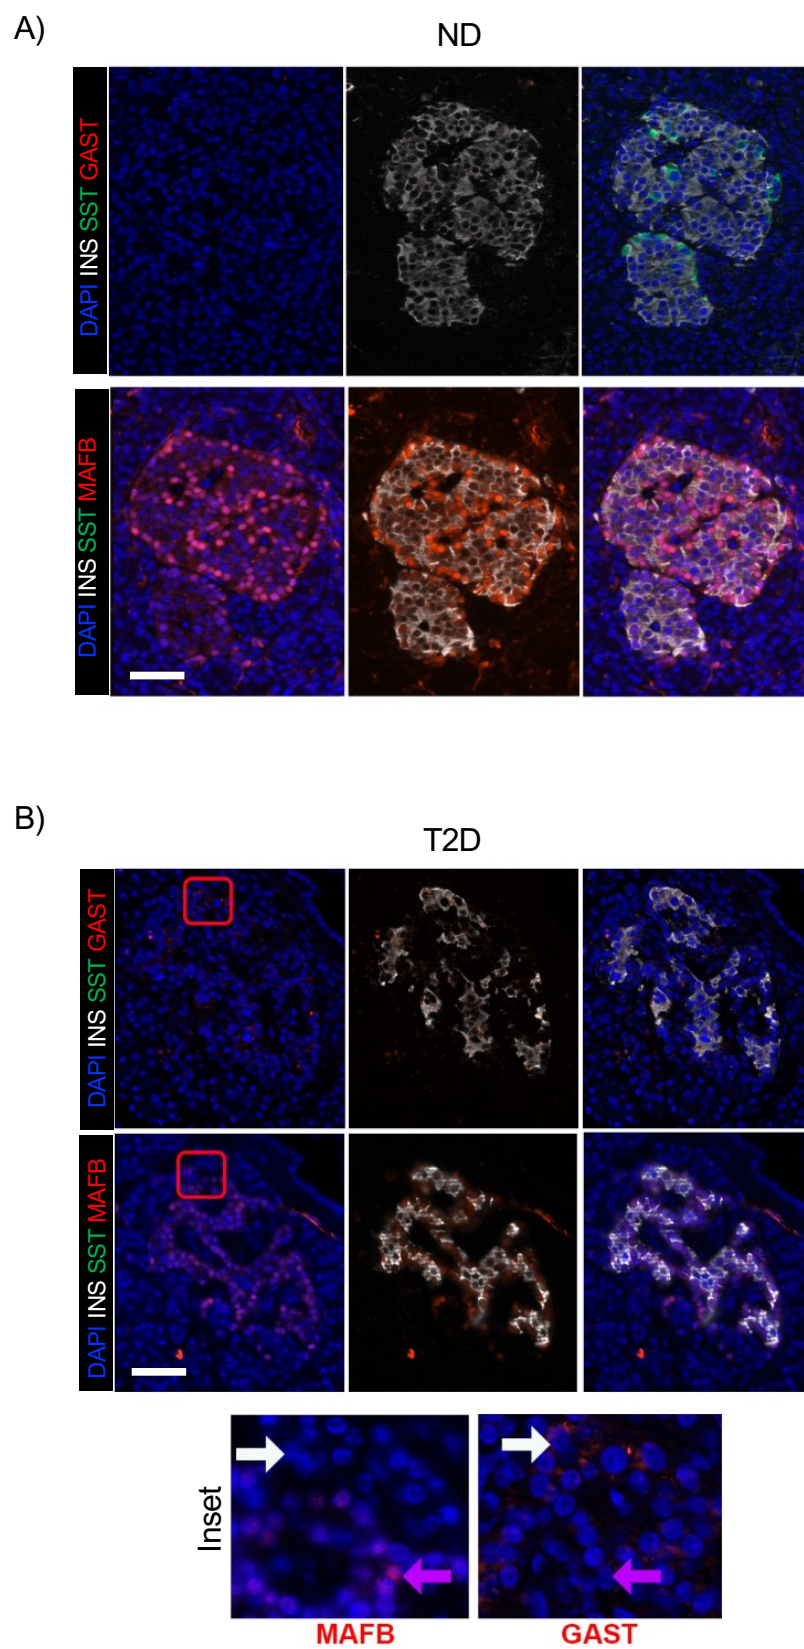

Supplemental Figure 7

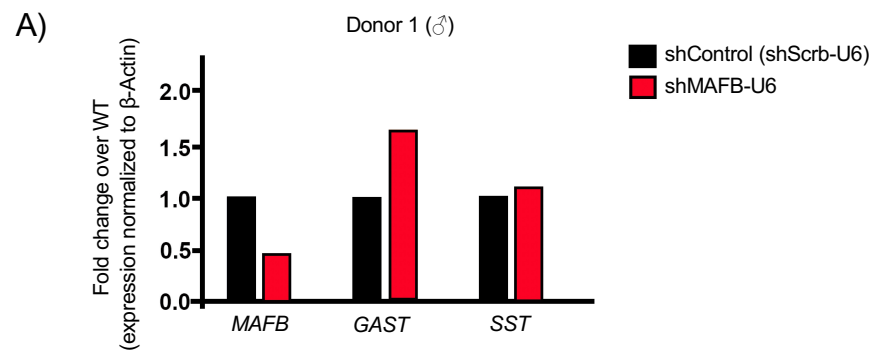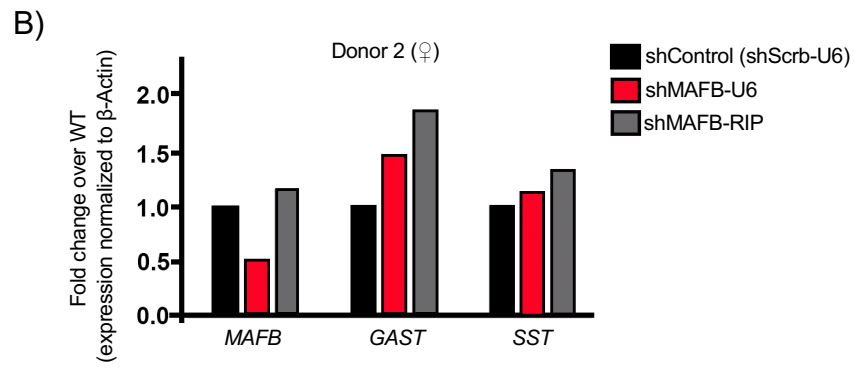

Supplemental Figure 8



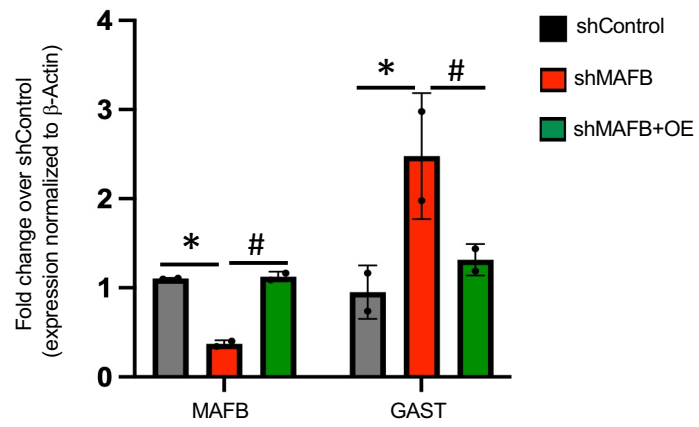

**Supplemental Figure 9**

### **Supplemental Figure 1: *MafA*<sup>Δβ</sup> mice are glucose intolerant**

(A) Immunostaining for MafA (red) and Ins (white) in 3-month-old male WT and *MafA*<sup>Δβ</sup> pancreata.

n=3 animals per group, and experiment repeated twice. Bar, 50μm.

(B) *MafA* mRNA levels in WT and *MafA*<sup>Δβ</sup> mouse islets. n=3-4 animals per group, and

experiment repeated twice. Mean ± SEM. \*p<0.05 by Student's t-test.

(C) IPGTT analysis of WT and *MafA*<sup>Δβ</sup> male and female mice. n=3-4 animals per group. Mean ±

SEM at each time point. \*p<0.05 by Student's t-test at the same time points.

### **Supplemental Figure 2: Aldh1a3, Foxo1, and Ngn3 are undetectable in *MafA*<sup>Δβ</sup> islets. qPCR**

analysis of Aldh1a3, Foxo1, and Ngn3 de-differentiation markers in *MafA*<sup>Δβ</sup> mouse islets. n=3-4

animals per group and sex. Mean ± SEM. n.d., not detected.

### **Supplemental Figure 3: The S961-induced *Gast*<sup>+</sup> gene signature is maintained in male, but not female, *ob/ob* mouse islets.**

(A) The presence of elevated *Gast*<sup>+</sup> signature genes were determined by analysis of the RNA-seq datasets prepared from FACS-sorted β cells of lean female (n=5 animals), lean male (n=5 animals), *ob/ob* female mice (n=2 animals), and *ob/ob* male mice (n=2 animals). The islet *Gast*<sup>+</sup> gene signature from S961-treated mice (**Supplemental Table 1**) largely overlapped with those in male and not female *ob/ob* mouse islet β cells.

(B) Heatmap of *Gast*<sup>+</sup> signature genes in female *MafA*<sup>Δβ</sup> islets. n=4 animals/condition.

### **Supplemental Figure 4: GAST protein production in MAFB<sup>KD</sup> EndoC-βH2 cells.**

GAST protein was produced at higher levels in MAFB<sup>KD</sup> EndoC-βH2 cells than shControl-treated cells. Human GAST was analyzed by ELISA in this representative graph. Mean ± SEM. n=2 replicates/group, and ELISA was repeated twice. \*p<0.05 by Student's t-test.

**Supplemental Figure 5: The MLL3/4 coregulator did not influence MAFB-mediated repression of *GAST* expression.**

Representative qPCR analysis of EndoC- $\beta$ H2 cells subject to MAFB and/or NCOA6 knockdown by shRNA and siRNA, respectively. Reduction of the core MLL3/4 subunit, NCOA6, did not accentuate *GAST* upregulation by MAFB reduction. Mean  $\pm$  SEM. n=2 replicates/group, and experiment was repeated 3 times. \*p<0.05 by Student's t-test, compared to siControl+shControl group. n.s., not significant.

**Supplemental Figure 6: Venn diagram analysis of the DEGs expressed in *Gast*<sup>+</sup> cells of S961-treated mouse islets, human MAFB<sup>KO</sup>  $\beta$ -like cells, and human stomach G cells with the broader MAFB<sup>KD</sup> EndoC- $\beta$ H2 cell population. Only *Gast* itself was enriched in all four datasets.**

**Supplemental Figure 7: *GAST* is produced in female MAFB-deficient T2D islet cells.**

(A-B) Representative image of immunostaining performed on serial sections to detect *GAST* (Red in top panels), MAFB (Red in bottom panels), SST (Green), INS (White), and nuclei (blue). *GAST*<sup>+</sup> cells were not detected in female healthy donor islets but were in T2D islets. Insets show magnified view of rare *GAST*<sup>+</sup>MAFB<sup>-</sup> (White arrows) and *GAST*<sup>-</sup>MAFB<sup>+</sup> (Purple arrows) cells. Bar, 100 $\mu$ m.

**Supplemental Figure 8: *GAST* is increased in MAFB<sup>KD</sup> human pseudoislets.**

(A-B) qPCR analysis of whole pseudoislets (n=2 donors) showed increased *GAST* expression upon targeting MAFB either in all islet cells (shMAFB-U6) or only  $\beta$  cells (shMAFB-RIP) in relation to the scramble control (shControl). Donor information in **Supplemental Table 3**.

**Supplemental Figure 9: Overexpression of MAFB in MAFB<sup>KD</sup> EndoC-βH2 cells masks GAST induction.** Representative qPCR analysis of EndoC-βH2 cells subject to MAFB knockdown with or without MAFB overexpression (OE). Mean ± SEM. n=2 replicates/group, and experiment was repeated twice. \*p<0.05 by Student's t-test compared to shControl. #p<0.05 by Student's t-test compared to shMAFB group.

**Supplemental Table 1: Mouse GAST<sup>+</sup> β cell signature (male) table**

**Supplemental Table 2: Human GAST<sup>+</sup> β cell signature (male) table**

**Supplemental Table 3: Human islet donor characteristics table**

**Supplemental Table 4: qPCR primer table**

**Supplemental Table 5: Primary antibody table**

**Supplemental Table 6: Competitor probe sequences table**

**Supplemental Table 7: Gene markers used to identify unique cell clusters in hESC-derived MAFA<sup>WT</sup> β-like cells**

**Supplemental Table 8: Gene markers used to identify unique cell clusters in hESC-derived MAFA<sup>KO</sup> β-like cells**
